# Supplementary material
Source: PubMed Central journal article supplement (PMC5822203)
Supplement: jamaneurol-74-590-s001.pdf [file jamaneurol-74-590-s001.pdf]

## Supplementary Online Content

Josephson CB, Lowerison M, Vallerand I, et al. Association of depression and treated depression with epilepsy and seizure outcomes: a multicohort analysis. *JAMA Neurol.* Published online February 27, 2017. doi:10.1001/jamaneurol.2016.5042

**eTable.** Hazard of developing depression when adjusting for known risk factors. Incident epilepsy is treated as a time-varying covariate in this Cox proportional hazards regression analysis

**eAppendix 1.** Read codes identified through a consensus driven process for depression

**eAppendix 2.** Read codes and multilex codes used to identify treatment for depression

This supplementary material has been provided by the authors to give readers additional information about their work.

**ONLINE TABLE:**

**eTable.** Hazard of developing depression when adjusting for known risk factors. Incident epilepsy is treated as a time-varying covariate in this Cox proportional hazards regression analysis.

|                                   | <b>Hazard ratio</b> | <b>95%CI</b> | <b>P value</b> |
|-----------------------------------|---------------------|--------------|----------------|
| <b>Incident epilepsy</b>          | 2.04                | 1.97-2.09    | <0.001         |
| <b>Age at index date</b>          | 1.003               | 1.003-1.003  | <0.001         |
| <b>Female sex</b>                 | 1.73                | 1.71-1.75    | <0.001         |
| <b>Townsend Index</b>             | 1.11                | 1.11-1.12    | <0.001         |
| <b>Charlson Comorbidity Index</b> | 1.19                | 1.18-1.20    | <0.001         |

\*Abbreviations: 95%CI = 95% Confidence interval

\*\*Hazard ratio for age, Townsend Index, and Charlson Comorbidity Index is for each incremental increase in value. Higher values indicate more social deprivation and a larger number of comorbidities.

## APPENDICES

### Appendix 1. Read codes identified through a consensus driven process for depression

---

Eu32y [X]Other depressive episodes / [X]Atypical depression / [X]Single episode of masked depression NOS

---

Eu33z [X]Recurrent depressive disorder, unspecified / [X]Monopolar depression NOS

---

E11z2 Masked depression

---

E135. Agitated depression

---

E1137 Recurrent depression

---

E2B1. Chronic depression

---

E112. Single major depressive episode / Agitated depression / Endogenous depression first episode / Endogenous depression first episode / Endogenous depression

---

E113. Recurrent major depressive episode / Endogenous depression - recurrent

---

Eu32. [X]Depressive episode / [X]Single episode of depressive reaction / [X]Single episode of psychogenic depression / [X]Single episode of reactive depression

---

Eu322 [X]Severe depressive episode without psychotic symptoms / [X]Single episode agitated depressn w/out psychotic symptoms / [X]Single episode major depression w/out psychotic symptoms / [X]Single episode vital depression w/out psychotic symptoms

---

Eu324 [X]Mild depression

---

Eu325 [X]Major depression, mild

---

---

Eu326 [X]Major depression, moderately severe

---

Eu327 [X]Major depression, severe without psychotic symptoms

---

Eu32z [X]Depressive episode, unspecified / [X]Depression NOS / [X]Depressive disorder NOS / [X]Prolonged single episode of reactive depression / [X] Reactive depression NOS

---

Eu33. [X]Recurrent depressive disorder / [X]Recurrent episodes of depressive reaction / [X]Recurrent episodes of psychogenic depression / [X]Recurrent episodes of reactive depression / [X]Seasonal depressive disorder / [X]SAD - Seasonal affective disorder

---

E1120 Single major depressive episode, unspecified

---

E1121 Single major depressive episode, mild

---

E1122 Single major depressive episode, moderate

---

E1123 Single major depressive episode, severe, without psychosis

---

E1125 Single major depressive episode, partial or unspec remission

---

E112z Single major depressive episode NOS

---

E1130 Recurrent major depressive episodes, unspecified

---

E1131 Recurrent major depressive episodes, mild

---

E1132 Recurrent major depressive episodes, moderate

---

---

E1133 Recurrent major depressive episodes, severe, no psychosis

---

E1135 Recurrent major depressive episodes, partial/unspec remission

---

E113z Recurrent major depressive episode NOS

---

E11y2 Atypical depressive disorder

---

E291. Prolonged depressive reaction

---

E2B. Depressive disorder NEC

---

Eu320 Mild depressive episode

---

Eu321 Moderate depressive episode

---

Eu330 Recurrent depressive disorder, current episode mild

---

Eu331 Recurrent depressive disorder, current episode moderate

---

Eu33y Other recurrent depressive disorders

---

Eu3y1 Other recurrent mood affective disorders / Recurrent brief depressive episodes

---

E130. Reactive depressive psychosis / Psychotic reactive depression

---

E1134 Recurrent major depressive episodes, severe, with psychosis

---

---

Eu323 [X]Severe depressive episode with psychotic symptoms / [X]Single episode of major depression and psychotic symptoms / [X]Single episode of psychogenic depressive psychosis / [X]Single episode of psychotic depression / [X]Single episode of reactive depressive psychosis

---

Eu328 [X]Major depression, severe with psychotic symptoms

---

E1124 Single major depressive episode, severe, with psychosis

## Appendix 2. Read codes and multilex codes used to identify treatment for depression

---

|            |                                      |
|------------|--------------------------------------|
| '91380998' | Citalopram tabs 20mg 28 tablet(s)    |
| '91380997' | Citalopram tabs 10mg 28 tablet(s)    |
| '91380996' | Citalopram tabs 40mg 28 tablet(s)    |
| '91671998' | Escitalopram tabs 10mg 28 tablet(s)  |
| '98561998' | Escitalopram tabs 20mg 28 tablet(s)  |
| '91395998' | CITALOPRAM 20mg tablets              |
| '87663998' | Escitalopram tabs 5mg 28 tablet(s)   |
| '88285998' | ESCITALOPRAM 10mg tablets            |
| '91395997' | CITALOPRAM 10mg tablets              |
| '92174998' | Citalopram oral drops 40mg/ml 15 mls |
| '91395996' | CITALOPRAM 40mg tablets              |
| '98088998' | ESCITALOPRAM 20mg tablets            |
| '87662998' | ESCITALOPRAM 5mg tablets             |
| '92172998' | CITALOPRAM 40mg/mL oral drops        |

---

---

|            |                                        |
|------------|----------------------------------------|
| '85971998' | Escitalopram oral drops 10mg/ml 28 mls |
| '95704990' | Citalopram tabs 20mg 28 tablet(s)      |
| '95705990' | Citalopram tabs 10mg 28 tablet(s)      |
| '95703990' | Citalopram tabs 40mg 28 tablet(s)      |
| '85970998' | ESCITALOPRAM 10mg/mL oral dps          |
| '95632990' | Citalopram tabs 20mg 28 tablet(s)      |
| '82791998' | Escitalopram oral drops 20mg/ml 15 mls |
| '95334990' | Citalopram tabs 20mg 28 tablet(s)      |
| '95666990' | Citalopram tabs 40mg 28 tablet(s)      |
| '95667990' | Citalopram tabs 20mg 28 tablet(s)      |
| '95668990' | Citalopram tabs 10mg 28 tablet(s)      |
| '95421990' | Citalopram tabs 10mg 28 tablet(s)      |
| '95335990' | Citalopram tabs 10mg 28 tablet(s)      |
| '95633990' | Citalopram tabs 10mg 28 tablet(s)      |
| '94894990' | Citalopram tabs 20mg 28 tablet(s)      |

---



---

|            |                                   |
|------------|-----------------------------------|
| '95333990' | Citalopram tabs 40mg 28 tablet(s) |
| '95420990' | Citalopram tabs 20mg 28 tablet(s) |
| '95418990' | Citalopram tabs 40mg 28 tablet(s) |
| '94936990' | Citalopram tabs 40mg 28 tablet(s) |
| '82790998' | ESCITALOPRAM 20mg/mL oral dps     |
| '95270990' | Citalopram tabs 20mg 28 tablet(s) |
| '95631990' | Citalopram tabs 40mg 28 tablet(s) |
| '94895990' | Citalopram tabs 10mg 28 tablet(s) |
| '94937990' | Citalopram tabs 20mg 28 tablet(s) |
| '94893990' | Citalopram tabs 40mg 28 tablet(s) |
| '95271990' | Citalopram tabs 10mg 28 tablet(s) |
| '87251998' | CITALOPRAM 10mg tablets           |
| '93948990' | Citalopram tabs 10mg 28 tablet(s) |
| '93994990' | Citalopram tabs 10mg 28 tablet(s) |
| '93996990' | Citalopram tabs 20mg 28 tablet(s) |

---

---

|            |                                        |
|------------|----------------------------------------|
| '94880990' | Citalopram tabs 40mg 28 tablet(s)      |
| '95269990' | Citalopram tabs 40mg 28 tablet(s)      |
| '91671998' | Escitalopram tabs 10mg 28 tablet(s)    |
| '98561998' | Escitalopram tabs 20mg 28 tablet(s)    |
| '87663998' | Escitalopram tabs 5mg 28 tablet(s)     |
| '88285998' | ESCITALOPRAM 10mg tablets              |
| '98088998' | ESCITALOPRAM 20mg tablets              |
| '87662998' | ESCITALOPRAM 5mg tablets               |
| '85971998' | Escitalopram oral drops 10mg/ml 28 mls |
| '85970998' | ESCITALOPRAM 10mg/mL oral dps          |
| '82791998' | Escitalopram oral drops 20mg/ml 15 mls |
| '82790998' | ESCITALOPRAM 20mg/mL oral dps          |
| '93173998' | Sertraline tabs 50mg 28 tablet(s)      |
| '93173997' | Sertraline tabs 100mg 28 tablet(s)     |
| '93174998' | SERTRALINE 50mg tablets                |

---

---

|            |                                     |
|------------|-------------------------------------|
| '93174997' | SERTRALINE 100mg tablets            |
| '86159998' | SERTRALINE                          |
| '93842990' | Sertraline tabs 100mg 28 tablet(s)  |
| '93732990' | Sertraline tabs 100mg 28 tablet(s)  |
| '93749990' | Sertraline tabs 50mg 28 tablet(s)   |
| '92729990' | Sertraline tabs 100mg 28 tablet(s)  |
| '92728990' | Sertraline tabs 50mg 28 tablet(s)   |
| '96493998' | Fluvoxamine tabs 50mg 60 tablet(s)  |
| '96493997' | Fluvoxamine tabs 100mg 30 tablet(s) |
| '96492998' | FLUVOXAMINE MALEATE 50mg tabs       |
| '96492997' | FLUVOXAMINE MALEATE 100mg tabs      |
| '96810989' | Fluvoxamine tabs 100mg 30 tablet(s) |
| '96345989' | Fluvoxamine tabs 100mg 30 tablet(s) |
| '93490998' | Paroxetine tabs 20mg 30 tablet(s)   |
| '93490997' | Paroxetine tabs 30mg 30 tablet(s)   |

---

---

|            |                                           |
|------------|-------------------------------------------|
| '93489998' | PAROXETINE 20mg tablets                   |
| '93489997' | PAROXETINE 30mg tablets                   |
| '93490996' | Paroxetine sf oral susp 20mg/10ml 150 mls |
| '85382998' | Paroxetine tabs 10mg 28 tablet(s)         |
| '93489996' | PAROXETINE 10mg/5mL s/f liq               |
| '84807998' | PAROXETINE 10mg tablets                   |
| '96087990' | Paroxetine tabs 20mg 30 tablet(s)         |
| '95051990' | Paroxetine tabs 20mg 30 tablet(s)         |
| '95578990' | Paroxetine tabs 20mg 30 tablet(s)         |
| '95332990' | Paroxetine tabs 20mg 30 tablet(s)         |
| '95350990' | Paroxetine tabs 20mg 30 tablet(s)         |
| '95007990' | Paroxetine tabs 30mg 30 tablet(s)         |
| '95028990' | Paroxetine tabs 30mg 30 tablet(s)         |
| '93487990' | Paroxetine tabs 30mg 30 tablet(s)         |
| '94447998' | Fluoxetine caps 20mg 30 capsule(s)        |

---

---

|            |                                         |
|------------|-----------------------------------------|
| '94490998' | FLUOXETINE 20mg capsules                |
| '94447997' | Fluoxetine oral soln 20mg/5ml 70 mls    |
| '94447996' | Fluoxetine caps 60mg 30 capsule(s)      |
| '90814998' | FLUOXETINE 20mg capsules                |
| '94490997' | FLUOXETINE 20mg/5mL oral liq            |
| '96729990' | Fluoxetine caps 20mg 30 capsule(s)      |
| '84403998' | Fluoxetine sf oral soln 20mg/5ml 70 mls |
| '94490996' | FLUOXETINE 60mg capsules                |
| '82367998' | FLUOXETINE tabs 10mg                    |
| '96651990' | Fluoxetine caps 20mg 30 capsule(s)      |
| '96709990' | Fluoxetine caps 20mg 30 capsule(s)      |
| '90159998' | FLUOXETINE 20mg capsules                |
| '96654990' | Fluoxetine caps 20mg 30 capsule(s)      |
| '99592998' | FLUOXETINE 20mg capsules                |
| '95610990' | Fluoxetine caps 60mg 30 capsule(s)      |

---

---

|            |                                              |
|------------|----------------------------------------------|
| '90766998' | FLUOXETINE 20mg/5mL oral liq                 |
| '96674990' | Fluoxetine caps 20mg 30 capsule(s)           |
| '96281990' | Fluoxetine caps 20mg 30 capsule(s)           |
| '84436998' | Fluoxetine hydrochloride product             |
| '96272990' | Fluoxetine caps 20mg 30 capsule(s)           |
| '96606990' | Fluoxetine caps 20mg 30 capsule(s)           |
| '96659990' | Fluoxetine caps 20mg 30 capsule(s)           |
| '95388990' | Fluoxetine caps 20mg 30 capsule(s)           |
| '93066990' | Fluoxetine caps 20mg 30 capsule(s)           |
| '95813990' | Fluoxetine oral soln 20mg/5ml 70 mls         |
| '96644990' | Fluoxetine caps 20mg 30 capsule(s)           |
| '95820990' | Fluoxetine syrp 20mg/5ml 70 mls              |
| '95426990' | Fluoxetine oral soln 20mg/5ml 70 mls         |
| '96647990' | Fluoxetine caps 20mg 30 capsule(s)           |
| '86998998' | Duloxetine gastro-res cap 60mg 84 capsule(s) |

---

---

|            |                                              |
|------------|----------------------------------------------|
| '86999998' | Duloxetine gastro-res cap 30mg 28 capsule(s) |
| '87337998' | Duloxetine gastro-res cap 20mg 56 capsule(s) |
| '87336998' | Duloxetine gastro-res cap 40mg 56 capsule(s) |
| '86996998' | DULOXETINE 60mg g/r capsules                 |
| '86997998' | DULOXETINE 30mg g/r capsules                 |
| '87335998' | DULOXETINE 20mg g/r capsules                 |
| '87334998' | DULOXETINE 40mg g/r capsules                 |
| '88776998' | Venlafaxine mr cap 75mg 14 capsule(s)        |
| '88776997' | Venlafaxine mr cap 150mg 14 capsule(s)       |
| '98336998' | Venlafaxine tabs 37.5mg 28 tablet(s)         |
| '98336997' | Venlafaxine tabs 75mg 28 tablet(s)           |
| '88755998' | VENLAFAXINE 75mg m/r capsules                |
| '88755997' | VENLAFAXINE 150mg m/r capsules               |
| '83159998' | Venlafaxine mr tab 150mg 28 tablet(s)        |
| '83160998' | Venlafaxine mr tab 75mg 28 tablet(s)         |

---

---

|            |                                       |
|------------|---------------------------------------|
| '99896998' | VENLAFAXINE 37.5mg tablets            |
| '99896997' | VENLAFAXINE 75mg tablets              |
| '82961998' | Venlafaxine mr tab 225mg 30 tablet(s) |
| '98336996' | Venlafaxine tabs 50mg 42 tablet(s)    |
| '82963998' | VENLAFAXINE 75mg m/r tablets          |
| '82962998' | VENLAFAXINE 150mg m/r tablets         |
| '82875998' | VENLAFAXINE 75mg m/r capsules         |
| '82874998' | VENLAFAXINE 150mg m/r capsules        |
| '82959998' | VENLAFAXINE 225mg m/r tablets         |
| '83150998' | VENLAFAXINE 75mg m/r capsules         |
| '83158998' | VENLAFAXINE 75mg m/r tablets          |
| '83149998' | VENLAFAXINE 150mg m/r capsules        |
| '83205998' | VENLAFAXINE 75mg m/r capsules         |
| '83204998' | VENLAFAXINE 150mg m/r capsules        |
| '99896996' | VENLAFAXINE 50mg tablets              |

---



---

|            |                                        |
|------------|----------------------------------------|
| '83157998' | VENLAFAXINE 150mg m/r tablets          |
| '86431998' | VENLAFAXINE                            |
| '81506998' | Venlafaxine mr tab 37.5mg 30 tablet(s) |
| '83163998' | VENLAFAXINE 37.5mg tablets             |
| '83218998' | VENLAFAXINE 75mg m/r capsules          |
| '83265998' | VENLAFAXINE 75mg m/r capsules          |
| '83162998' | VENLAFAXINE 75mg m/r tablets           |
| '83264998' | VENLAFAXINE 150mg m/r capsules         |
| '81505998' | VENLAFAXINE 37.5mg m/r tablets         |
| '83217998' | VENLAFAXINE 150mg m/r capsules         |
| '81930998' | Venlafaxine product                    |
| '81929998' | Venlafaxine product                    |
| '83114998' | VENLAFAXINE 150mg m/r capsules         |
| '83115998' | VENLAFAXINE 75mg m/r capsules          |
| '83075998' | VENLAFAXINE 75mg m/r capsules          |

---

---

|            |                                           |
|------------|-------------------------------------------|
| '82540998' | Venlafaxine product                       |
| '88717998' | Mirtazapine tabs 30mg 30 tablet(s)        |
| '86982998' | Mirtazapine tabs 15mg 28 tablet(s)        |
| '86981998' | Mirtazapine tabs 45mg 30 tablet(s)        |
| '87687998' | Mirtazapine orodisp tab 15mg 6 tablet(s)  |
| '87946998' | Mirtazapine orodisp tab 30mg 30 tablet(s) |
| '87686998' | Mirtazapine orodisp tab 45mg 30 tablet(s) |
| '88715998' | MIRTAZAPINE 30mg tablets                  |
| '87945998' | MIRTAZAPINE 30mg disp tabs                |
| '87685998' | MIRTAZAPINE 15mg disp tabs                |
| '87684998' | MIRTAZAPINE 45mg disp tabs                |
| '87430998' | MIRTAZAPINE                               |
| '94847990' | Mirtazapine tabs 30mg 28 tablet(s)        |
| '94035990' | Mirtazapine tabs 45mg 28 tablet(s)        |
| '94400990' | Mirtazapine tabs 45mg 28 tablet(s)        |

---

---

|            |                                           |
|------------|-------------------------------------------|
| '94401990' | Mirtazapine tabs 15mg 28 tablet(s)        |
| '92992990' | Mirtazapine orodisp tab 45mg 30 tablet(s) |
| '92814990' | Mirtazapine tabs 15mg 28 tablet(s)        |
| '92979990' | Mirtazapine orodisp tab 45mg 30 tablet(s) |
| '93178990' | Mirtazapine orodisp tab 45mg 30 tablet(s) |
| '94037990' | Mirtazapine tabs 15mg 28 tablet(s)        |
| '92981990' | Mirtazapine orodisp tab 15mg 30 tablet(s) |
| '92980990' | Mirtazapine orodisp tab 30mg 30 tablet(s) |
| '93180990' | Mirtazapine orodisp tab 15mg 30 tablet(s) |
| '94797990' | Mirtazapine tabs 30mg 28 tablet(s)        |
| '92906990' | Mirtazapine orodisp tab 15mg 30 tablet(s) |
| '92454990' | Mirtazapine orodisp tab 15mg 30 tablet(s) |
| '92903990' | Mirtazapine orodisp tab 45mg 30 tablet(s) |
| '92986990' | Mirtazapine orodisp tab 45mg 30 tablet(s) |
| '92988990' | Mirtazapine orodisp tab 15mg 30 tablet(s) |

---

---

|            |                                                         |
|------------|---------------------------------------------------------|
| '94250990' | Mirtazapine tabs 15mg 28 tablet(s)                      |
| '92309998' | Bupropion mr tab 150mg 60 tablet(s)                     |
| '92311998' | BUPROPION HCL 150mg m/r tabs                            |
| 7L1a.00    | Cognitive behavioural therapy                           |
| 7L1a000    | Cognitive behavioural therapy by unidisciplinary team   |
| 7L1a100    | Cognitive behavioural therapy by multidisciplinary team |
| 7L1ay00    | Other specified cognitive behavioural therapy           |
| 7L1az00    | Cognitive behavioural therapy NOS                       |
| 8G1..00    | General psychotherapy                                   |
| 8G10.00    | Psychotherapy - behavioural                             |
| 8G11.00    | Psychotherapy - cognitive                               |
| 8G12.00    | Psychotherapy - psychodynamic                           |
| 8G13.00    | Cognitive-behaviour therapy                             |
| 8G14.00    | Cognitive analytic therapy                              |
| 8G15.00    | Computerised cognitive behavioural therapy              |

---

---

|         |                                                  |
|---------|--------------------------------------------------|
| Z5...00 | Psychotherapy                                    |
| Z52..00 | Cognitive and behavioural therapy                |
| Z521.00 | Cognitive - behaviour therapy                    |
| Z521.11 | CBT - Cognitive - behaviour therapy              |
| Z521.12 | Cognitive-behavioural therapy approach           |
| Z521.13 | Cognitive-behaviour therapy                      |
| Z521100 | Generic cognitive behavioural therapy            |
| Z522.00 | Behavioural psychotherapy                        |
| Z522.11 | Behaviour therapy                                |
| Z522.13 | Cognitive therapy approach                       |
| Z522.14 | Cognitive approach                               |
| Z522.16 | Structural psychotherapy                         |
| Z4I..00 | Psychodynamic interventions relating to emotions |
| Z4I..11 | Psychodynamic interventions relating to feelings |
| Z5A..00 | Psychoanalytic and psychodynamic therapy         |

---

---

|            |                                           |
|------------|-------------------------------------------|
| Z5A..11    | Psychoanalytical - psychodynamic therapy  |
| Z5A..12    | Explorative psychotherapy                 |
| Z5A3.00    | Psychodynamic psychotherapy               |
| Z5A3100    | Long-term psychodynamic psychotherapy     |
| Z5A3400    | Psychodynamic-interpersonal psychotherapy |
| Z5A4.00    | Brief focal psychodynamic therapy         |
| 8G9Z.00    | Other psychotherapy NOS                   |
| Z523.00    | Cognitive therapy                         |
| Z523.11    | Cognitive therapy approach                |
| Z523.12    | Cognitive approach                        |
| Z523100    | Beck's cognitive therapy                  |
| Z523200    | Rational emotive therapy                  |
| Z523211RET | Rational emotive therapy                  |
| Z523300    | Cognitive restructuring                   |

---
